# Supplementary material for: The Prevalence and Risk Factors for Pneumococcal Colonization of the Nasopharynx among Children in Kilifi District, Kenya
Source: PubMed Central journal article supplement (PMC3282706; doi:10.1371/journal.pone.0030787), 2012-02-20
Supplement: pone.0030787.s001.pdf [file pone.0030787.s001.pdf]

**Figure S1. Correlation of monthly pneumococcal carriage prevalence with monthly estimates of meteorological variables.**

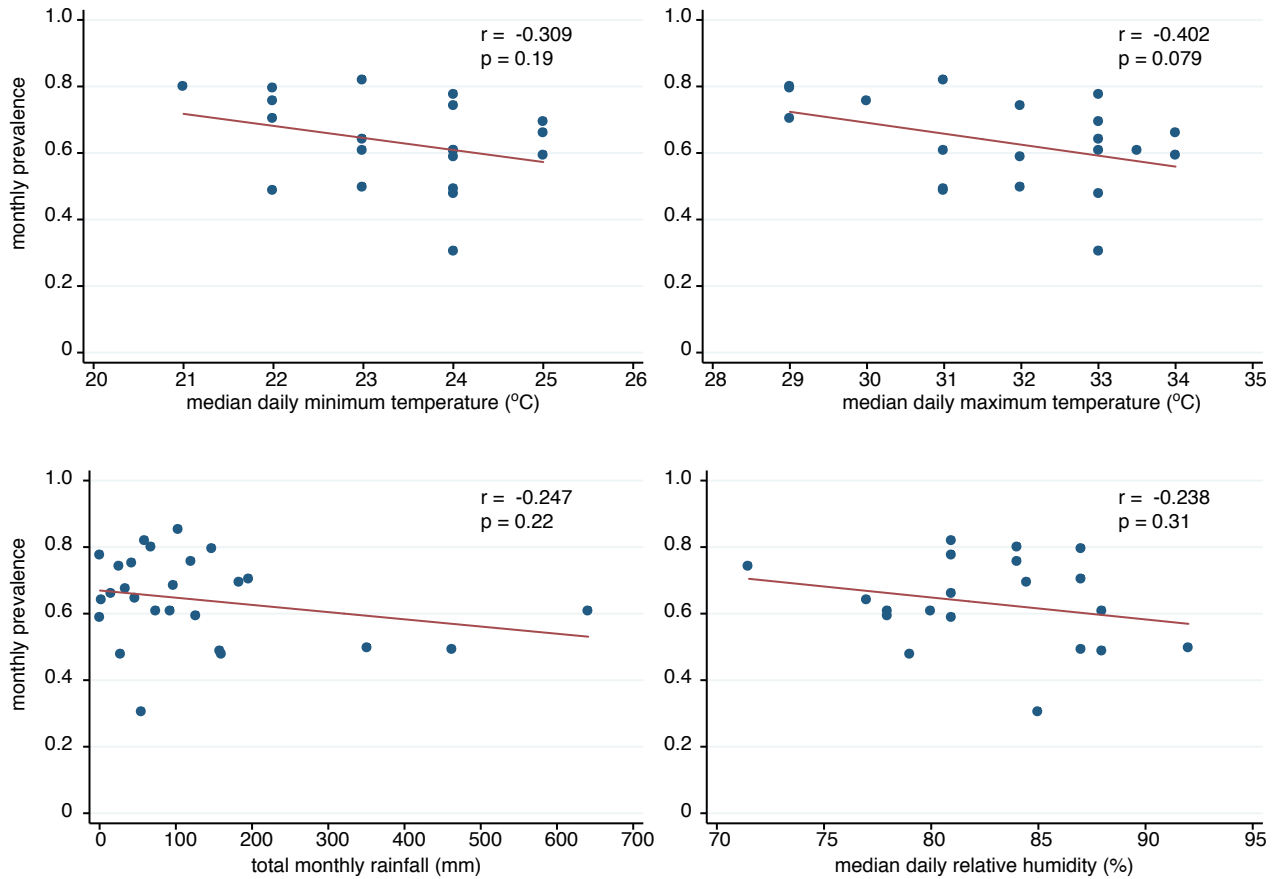

The figures show the scatter of monthly prevalence of carriage of *S. pneumoniae* in the population based sample of children aged 3-59 months against the monthly summaries of weather variables measured on a daily basis. Data on weather were available for the 26 study months (daily rainfall) or for 20 months (daily minimum/maximum temperature and daily relative humidity.)
