# Supplementary material for: The Prevalence and Risk Factors for Pneumococcal Colonization of the Nasopharynx among Children in Kilifi District, Kenya
Source: PubMed Central journal article supplement (PMC3282706; doi:10.1371/journal.pone.0030787), 2012-02-20
Supplement: pone.0030787.s002.pdf [file pone.0030787.s002.pdf]

**Table S1. Prevalence of carriage by risk factor, with univariate odds ratios (and 95% CIs) and adjusted odds ratios (and 95% CIs) in a multivariable logistic regression model**

| Exposure variable              | Value  | Swabs | Cultures | Prevalence | OR   | 95% CI    | aOR  | 95% CI    |
|--------------------------------|--------|-------|----------|------------|------|-----------|------|-----------|
| Sex                            |        |       |          |            |      |           |      |           |
|                                | female | 1405  | 934      | 0.67       | 1.00 |           |      |           |
|                                | male   | 1435  | 934      | 0.65       | 0.94 | 0.81-1.10 |      |           |
| Age                            |        |       |          |            |      |           |      |           |
|                                | 3-5m   | 108   | 78       | 0.72       | 1.00 |           | 1.00 |           |
|                                | 6-11m  | 278   | 220      | 0.79       | 1.46 | 0.88-2.43 | 1.33 | 0.77-2.28 |
|                                | 12-17m | 304   | 225      | 0.74       | 1.10 | 0.67-1.79 | 0.86 | 0.51-1.45 |
|                                | 18-23m | 325   | 230      | 0.71       | 0.93 | 0.57-1.51 | 0.86 | 0.51-1.43 |
|                                | 24-29m | 300   | 202      | 0.67       | 0.79 | 0.49-1.29 | 0.63 | 0.37-1.05 |
|                                | 30-35m | 311   | 199      | 0.64       | 0.68 | 0.42-1.10 | 0.60 | 0.36-1.00 |
|                                | 36-41m | 277   | 180      | 0.65       | 0.71 | 0.44-1.16 | 0.60 | 0.36-1.02 |
|                                | 42-47m | 310   | 190      | 0.61       | 0.61 | 0.38-0.98 | 0.54 | 0.33-0.9  |
|                                | 48-53m | 319   | 186      | 0.58       | 0.54 | 0.33-0.87 | 0.49 | 0.29-0.81 |
|                                | 54-59m | 308   | 158      | 0.51       | 0.41 | 0.25-0.65 | 0.37 | 0.22-0.62 |
| Month of the year when sampled |        |       |          |            |      |           |      |           |
|                                | Jan    | 216   | 110      | 0.51       | 1.00 |           | 1.00 |           |
|                                | Feb    | 278   | 188      | 0.68       | 2.01 | 1.40-2.90 | 1.68 | 1.14-2.48 |
|                                | Mar    | 225   | 139      | 0.62       | 1.56 | 1.07-2.27 | 1.48 | 0.99-2.21 |
|                                | Apr    | 220   | 140      | 0.64       | 1.69 | 1.15-2.47 | 1.85 | 1.23-2.80 |
|                                | May    | 278   | 148      | 0.53       | 1.10 | 0.77-1.57 | 1.11 | 0.76-1.64 |
|                                | Jun    | 280   | 193      | 0.69       | 2.14 | 1.48-3.09 | 1.86 | 1.25-2.78 |
|                                | Jul    | 271   | 225      | 0.83       | 4.71 | 3.11-7.13 | 4.05 | 2.60-6.30 |
|                                | Aug    | 118   | 89       | 0.75       | 2.96 | 1.80-4.86 | 2.52 | 1.49-4.27 |
|                                | Sep    | 178   | 134      | 0.75       | 2.93 | 1.90-4.52 | 2.58 | 1.61-4.15 |
|                                | Oct    | 326   | 239      | 0.73       | 2.65 | 1.84-3.80 | 2.25 | 1.52-3.34 |
|                                | Nov    | 337   | 204      | 0.61       | 1.48 | 1.05-2.09 | 1.30 | 0.89-1.88 |
|                                | Dec    | 113   | 59       | 0.52       | 1.05 | 0.67-1.66 | 0.87 | 0.53-1.42 |

| Exposure variable                                    | Value    | Swabs | Cultures | Prevalence | OR   | 95% CI    | aOR  | 95% CI    |
|------------------------------------------------------|----------|-------|----------|------------|------|-----------|------|-----------|
| Has the child had cough in the last 2 weeks?         |          |       |          |            |      |           |      |           |
|                                                      | no       | 1420  | 789      | 0.56       | 1.00 |           | 1.00 |           |
|                                                      | yes      | 1420  | 1079     | 0.76       | 2.53 | 2.15-2.96 | 1.55 | 1.26-1.91 |
| Has the child had a runny nose in the last 2 weeks?  |          |       |          |            |      |           |      |           |
|                                                      | no       | 1156  | 582      | 0.50       | 1.00 |           | 1.00 |           |
|                                                      | yes      | 1684  | 1286     | 0.76       | 3.18 | 2.71-3.73 | 2.62 | 2.12-3.34 |
| Has the child taken antibiotics in the last 2 weeks? |          |       |          |            |      |           |      |           |
|                                                      | no       | 2729  | 1801     | 0.66       | 1.00 |           | 1.00 |           |
|                                                      | yes      | 111   | 67       | 0.60       | 0.78 | 0.53-1.16 | 0.53 | 0.34-0.81 |
| Has the child taken fansidar in the last 2 weeks?    |          |       |          |            |      |           |      |           |
|                                                      | no       | 2810  | 1851     | 0.66       | 1.00 |           |      |           |
|                                                      | yes      | 30    | 17       | 0.57       | 0.68 | 0.33-1.40 |      |           |
| Has the child been hospitalised in the last month?   |          |       |          |            |      |           |      |           |
|                                                      | no       | 2832  | 1863     | 0.66       | 1.00 |           |      |           |
|                                                      | yes      | 8     | 5        | 0.63       | 0.87 | 0.21-3.63 |      |           |
| Does the child sleep in the room used for cooking?   |          |       |          |            |      |           |      |           |
|                                                      | no       | 2344  | 1524     | 0.65       | 1.00 |           |      |           |
|                                                      | yes      | 496   | 344      | 0.69       | 1.22 | 0.99-1.50 |      |           |
| What type of cooking fuel is used?                   |          |       |          |            |      |           |      |           |
|                                                      | firewood | 2761  | 1814     | 0.66       | 1.00 |           |      |           |
|                                                      | gas      | 10    | 8        | 0.80       | 2.09 | 0.44-9.85 |      |           |
|                                                      | charcoal | 60    | 41       | 0.68       | 1.13 | 0.65-1.95 |      |           |
|                                                      | paraffin | 9     | 5        | 0.56       | 0.65 | 0.17-2.44 |      |           |

| Exposure variable                                       | Value     | Swabs | Cultures | Prevalence | OR   | 95% CI    | aOR  | 95% CI    |
|---------------------------------------------------------|-----------|-------|----------|------------|------|-----------|------|-----------|
| Is there a cigarette smoker in the home?                |           |       |          |            |      |           |      |           |
|                                                         | no        | 2323  | 1500     | 0.65       | 1.00 |           |      |           |
|                                                         | yes       | 517   | 368      | 0.71       | 1.36 | 1.10-1.67 |      |           |
| Month of study                                          |           |       |          |            |      |           |      |           |
|                                                         | per month |       |          |            | 1.00 |           | 1.00 |           |
|                                                         |           |       |          |            | 1.00 | 0.99-1.01 | 0.98 | 0.96-0.99 |
| Has any co-resident been hospitalised in the last month |           |       |          |            |      |           |      |           |
|                                                         | no        | 2822  | 1856     |            | 1.00 |           |      |           |
|                                                         | yes       | 18    | 12       |            | 1.04 | 0.39-2.78 |      |           |
| No. of other children (0-2y) in the household           |           |       |          |            |      |           |      |           |
|                                                         | per child |       |          |            | 1.00 |           |      |           |
|                                                         |           |       |          |            | 0.82 | 0.71-0.95 |      |           |
| No. of other children (3-4y) in the household           |           |       |          |            |      |           |      |           |
|                                                         | per child |       |          |            | 1.00 |           |      |           |
|                                                         |           |       |          |            | 1.11 | 0.97-1.28 |      |           |
| No. of children (5-9y) in the household                 |           |       |          |            |      |           |      |           |
|                                                         | per child |       |          |            | 1.00 |           |      |           |
|                                                         |           |       |          |            | 1.05 | 0.97-1.14 |      |           |
| No. of children (10-14y) in the household               |           |       |          |            |      |           |      |           |
|                                                         | per child |       |          |            | 1.00 |           |      |           |
|                                                         |           |       |          |            | 1.01 | 0.95-1.07 |      |           |
| No. of children ( $\leq$ 5y) sharing a bed              |           |       |          |            |      |           |      |           |
|                                                         | per child |       |          |            | 1.00 |           |      |           |
|                                                         |           |       |          |            | 0.95 | 0.84-1.07 |      |           |

| Exposure variable           | Value            | Swabs | Cultures | Prevalence | OR   | 95% CI    | aOR  | 95% CI    |
|-----------------------------|------------------|-------|----------|------------|------|-----------|------|-----------|
| Location of residence       |                  |       |          |            |      |           |      |           |
|                             | Banda ra salama  | 94    | 73       | 0.78       | 1.00 |           |      |           |
|                             | Chasimba         | 207   | 133      | 0.64       | 0.52 | 0.29-0.91 |      |           |
|                             | Jaribuni         | 65    | 38       | 0.59       | 0.40 | 0.20-0.81 |      |           |
|                             | Junju            | 282   | 186      | 0.66       | 0.56 | 0.32-0.96 |      |           |
|                             | Kauma            | 114   | 97       | 0.85       | 1.64 | 0.81-3.33 |      |           |
|                             | Kilifi township  | 269   | 190      | 0.71       | 0.69 | 0.40-1.20 |      |           |
|                             | Malindi          | 129   | 68       | 0.53       | 0.32 | 0.18-0.58 |      |           |
|                             | Matsango ni      | 239   | 117      | 0.49       | 0.28 | 0.16-0.48 |      |           |
|                             | Mtwapa           | 123   | 80       | 0.65       | 0.54 | 0.29-0.99 |      |           |
|                             | Ngerenya         | 253   | 168      | 0.66       | 0.57 | 0.33-0.99 |      |           |
|                             | Roka             | 251   | 167      | 0.67       | 0.57 | 0.33-0.99 |      |           |
|                             | Soko ke          | 137   | 95       | 0.69       | 0.65 | 0.35-1.19 |      |           |
|                             | Takaungu Mavueni | 245   | 168      | 0.69       | 0.63 | 0.36-1.09 |      |           |
|                             | Tezo             | 256   | 157      | 0.61       | 0.46 | 0.26-0.79 |      |           |
|                             | Ziani            | 176   | 131      | 0.74       | 0.84 | 0.46-1.51 |      |           |
| Fieldworker taking the swab |                  |       |          |            |      |           |      |           |
|                             | A                | 408   | 266      | 0.65       | 1.00 |           | 1.00 |           |
|                             | B                | 11    | 7        | 0.64       | 0.93 | 0.27-3.25 | 0.76 | 0.19-3.03 |
|                             | C                | 288   | 197      | 0.68       | 1.16 | 0.84-1.59 | 1.34 | 0.94-1.90 |
|                             | D                | 101   | 65       | 0.64       | 0.96 | 0.61-1.52 | 0.89 | 0.53-1.52 |
|                             | E                | 708   | 473      | 0.67       | 1.07 | 0.83-1.39 | 0.61 | 0.45-0.82 |
|                             | F                | 109   | 61       | 0.56       | 0.68 | 0.44-1.04 | 0.62 | 0.37-1.03 |
|                             | G                | 192   | 121      | 0.63       | 0.91 | 0.64-1.30 | 1.16 | 0.78-1.71 |
|                             | H                | 506   | 332      | 0.66       | 1.02 | 0.77-1.34 | 0.84 | 0.62-1.13 |
|                             | I                | 517   | 346      | 0.67       | 1.08 | 0.82-1.42 | 0.94 | 0.70-1.28 |

OR Odds Ratio; aOR adjusted Odds Ratio. The prevalence of carriage varied significantly by administrative location ( $\chi^2$  (14) 79,  $p < 0.0005$ ) therefore this was not included in the final model as several of the proximal causes (e.g. use of antibiotics, cigarette smoke exposure) varied markedly by location. The final model fit was tested using Hosmer-Lemeshow test in 10 covariate strata ( $p = 0.97$ ).
