# Supplementary material for: The Prevalence and Risk Factors for Pneumococcal Colonization of the Nasopharynx among Children in Kilifi District, Kenya
Source: PubMed Central journal article supplement (PMC3282706; doi:10.1371/journal.pone.0030787), 2012-02-20
Supplement: pone.0030787.s003.pdf [file pone.0030787.s003.pdf]

**Table S2. Serotype carriage prevalence in population-based and HIV-infected samples**

| Serotype  | Population-based sample |                | HIV-infected sample |                |
|-----------|-------------------------|----------------|---------------------|----------------|
|           | N                       | Prevalence (%) | N                   | Prevalence (%) |
| 19F       | 283                     | 9.96           | 14                  | 14             |
| 6A        | 237                     | 8.35           | 13                  | 13             |
| 6B        | 184                     | 6.48           | 5                   | 5              |
| 23F       | 117                     | 4.12           | 9                   | 9              |
| 11A       | 90                      | 3.17           | 1                   | 1              |
| 14        | 85                      | 2.99           | 1                   | 1              |
| 35B       | 84                      | 2.96           | 2                   | 2              |
| 23B       | 70                      | 2.46           | 1                   | 1              |
| 10A       | 56                      | 1.97           | 0                   | 0              |
| 15B       | 54                      | 1.90           | 3                   | 3              |
| 19A       | 53                      | 1.87           | 1                   | 1              |
| 9V        | 51                      | 1.80           | 3                   | 3              |
| 13        | 49                      | 1.73           | 3                   | 3              |
| 15A       | 49                      | 1.73           | 2                   | 2              |
| 15C       | 43                      | 1.51           | 2                   | 2              |
| 34        | 38                      | 1.34           | 0                   | 0              |
| 3         | 34                      | 1.20           | 4                   | 4              |
| 16F       | 34                      | 1.20           | 0                   | 0              |
| 18C       | 29                      | 1.02           | 0                   | 0              |
| 19B       | 25                      | 0.88           | 2                   | 2              |
| 7C        | 23                      | 0.81           | 1                   | 1              |
| 20        | 21                      | 0.74           | 3                   | 3              |
| 23A       | 19                      | 0.67           | 1                   | 1              |
| 21        | 18                      | 0.63           | 0                   | 0              |
| 35A       | 15                      | 0.53           | 0                   | 0              |
| 1         | 13                      | 0.46           | 0                   | 0              |
| 33B       | 13                      | 0.46           | 0                   | 0              |
| 4         | 12                      | 0.42           | 0                   | 0              |
| 38        | 8                       | 0.28           | 0                   | 0              |
| 35F       | 7                       | 0.25           | 1                   | 1              |
| 10F       | 6                       | 0.21           | 0                   | 0              |
| 12F       | 4                       | 0.14           | 0                   | 0              |
| 24F       | 4                       | 0.14           | 0                   | 0              |
| 33D       | 4                       | 0.14           | 1                   | 1              |
| 10B       | 3                       | 0.11           | 0                   | 0              |
| 17F       | 3                       | 0.11           | 0                   | 0              |
| 18F       | 3                       | 0.11           | 0                   | 0              |
| 22A       | 3                       | 0.11           | 0                   | 0              |
| 22F       | 3                       | 0.11           | 0                   | 0              |
| 28F       | 3                       | 0.11           | 0                   | 0              |
| 29        | 3                       | 0.11           | 1                   | 1              |
| 8         | 2                       | 0.07           | 0                   | 0              |
| 9L        | 2                       | 0.07           | 0                   | 0              |
| 12B       | 2                       | 0.07           | 0                   | 0              |
| 5         | 1                       | 0.04           | 0                   | 0              |
| 7F        | 1                       | 0.04           | 0                   | 0              |
| 11D       | 1                       | 0.04           | 0                   | 0              |
| 15F       | 1                       | 0.04           | 0                   | 0              |
| 19C       | 1                       | 0.04           | 0                   | 0              |
| 28A       | 1                       | 0.04           | 0                   | 0              |
| 31        | 1                       | 0.04           | 0                   | 0              |
| 33C       | 1                       | 0.04           | 0                   | 0              |
| 40        | 1                       | 0.04           | 0                   | 0              |
| 9N        | 0                       | 0              | 1                   | 1              |
| All types | 1868                    | 65.8           | 99                  | 76             |
